# Supplementary material for: A modular field system enabling cavity ring-down spectroscopy of in-situ vapor observations in harsh environments: The ISE-CUBE system
Source: Copernicus journal article supplement (doi:10.5194/amt-2022-208), 2022-07-18
Supplement: Supplementary file 1 [file amt-2022-208-supplement.zip]

Archive with 2 entries (2 files):
- Seidl_et_al_2022_Supplement.pdf
- Supplemental_files.zip
